# Supplementary material for: Elevated Blood Alcohol Concentration Is Associated with Improved Clinical Outcomes of Intravenous Thrombolysis Treatment in Acute Ischemic Stroke Patients—A Retrospective Study
Source: MDPI journal article supplement (doi:10.3390/jcm12062238), 2023-03-14
Supplement: s1 [file s1]

**Supplementary Table S1. Association between baseline clinical data, laboratory parameters and short term outcomes in cases (alcohol group) and controls.**

|                                         | Good outcome        | Unchanged state     | Poor outcome      | p                                                                        |
|-----------------------------------------|---------------------|---------------------|-------------------|--------------------------------------------------------------------------|
| Number of patients, n (%)               | 114                 | 105                 | 21                |                                                                          |
| Male, n (%)                             | 97 (85)             | 90 (86)             | 17 (80)           | 0.855                                                                    |
| Age (years), median (IQR)               | 58 (51-67)          | 63 (56-70)          | 64 (60-70)        | <b>0.010</b>                                                             |
| Etanol level (‰), median (IQR)          | 1.57 (0.59-2.28)    | 0.59 (0.29-0.83)    | 0.60 (0.10-1.51)  | <b>0.016</b>                                                             |
| Acute alcohol consumption, n (%)        | 49 (43)             | 8 (8)               | 3(14)             | <b>&lt;0.001</b>                                                         |
| Affected brain area, n (%)              |                     |                     |                   |                                                                          |
| VBI                                     | 31 (27)             | 29 (28)             | 4 (19)            | 0.723                                                                    |
| Dominant MCA area                       | 30 (26)             | 21 (20)             | 6 (29)            |                                                                          |
| Non-dominant MCA area                   | 53 (47)             | 55 (52)             | 11 (52)           |                                                                          |
| Cerebrovascular risk factors, n (%)     |                     |                     |                   |                                                                          |
| Hypertension                            | 73 (64)             | 87 (83)             | 19 (90)           | <b>0.001</b>                                                             |
| Diabetes mellitus                       | 16 (14)             | 25 (24)             | 6 (29)            | 0.106                                                                    |
| Hyperlipidemia                          | 55 (48)             | 42 (40)             | 7 (33)            | 0.294                                                                    |
| Atrial fibrillation                     | 16 (14)             | 8 (8)               | 3 (14)            | 0.300                                                                    |
| Previous stroke                         | 14 (12)             | 12 (11)             | 5 (24)            | 0.292                                                                    |
| Previous myocardial infarction          | 8 (7)               | 14 (13)             | 3 (14)            | 0.259                                                                    |
| Previous peripheral artery disease      | 3 (2.6)             | 2 (2)               | 0 (0)             | 0.702                                                                    |
| Current smoker                          | 63 (55)             | 46 (44)             | 11 (52)           | 0.232                                                                    |
| BMI, median (IQR)                       | 26.8 (23.8-30.9)    | 28.1 (23.4-30.8)    | 28.7 (23.2-33.3)  | 0.365                                                                    |
| Admission antiplatelet therapy, n (%)   | 21 (18)             | 30 (29)             | 7 (33)            | 0.127                                                                    |
| Admission anticoagulant drug, n (%)     | 6 (5)               | 3 (3)               | 3 (14)            | 0.089                                                                    |
| Admission antidiabetic therapy, n (%)   | 11 (10)             | 17 (16)             | 7 (33)            | <b>0.014</b>                                                             |
| Admission lipid lowering therapy, n (%) | 14 (12)             | 15 (14)             | 7 (33)            | <b>0.044</b>                                                             |
| Admission NIHSS, median (IQR)           | 9 (6-13)            | 6 (5-11)            | 10 (7-13)         | <b>&lt;0.001</b><br><b>0.005<sup>+</sup></b><br><b>0.022<sup>#</sup></b> |
| OTN, min, median (IQR)                  | 135 (108-175)       | 140 (112-182)       | 138 (101-183)     | 0.234                                                                    |
| DTN min, median (IQR)                   | 43 (32-57)          | 42 (31-56)          | 42 (36-56)        | 0.798                                                                    |
| Rt-PA dose, mg, median (IQR)            | 71.0 (60.0-86.0)    | 72.0 (60.0-82.5)    | 77.0 (55.0-82.0)  | 0.790                                                                    |
| Laboratory parameters, median (IQR)     |                     |                     |                   |                                                                          |
| Serum sodium (mmol/L)                   | 139.0 (137.0-142.0) | 139.0 (137.5-141.0) | 139 (137.0-142.0) | 0.956                                                                    |
| Serum glucose (mmol/L)                  | 6.0 (5.3-7.1)       | 6.3 (5.5-7.8)       | 6.5 (5.6-8.6)     | 0.079                                                                    |
| Creatinine (μmol/L)                     | 73.0 (65.8-90.0)    | 73.0 (63.3-88.8)    | 79 (64.0-103.0)   | 0.467                                                                    |
| HsCRP (mg/L)                            | 2.48 (1.18-4.93)    | 2.53 (1.31-5.10)    | 4.0 (1.84-15.7)   | <b>0.049</b>                                                             |
| AST (U/L)                               | 22.0 (17.0-30.0)    | 19.0 (15.0-23.0)    | 19.0 (15.0-24.0)  | <b>0.004</b><br><b>0.004<sup>+</sup></b>                                 |
| ALT (U/L)                               | 20.0 (14.0-34.3)    | 18.0 (13.0-24.0)    | 18.0 (11.5-24.3)  | 0.200                                                                    |
| GGT (U/L)                               | 50.0 (28.5-92.3)    | 31.0 (20.8-51.5)    | 37.0 (22.5-51.0)  | <b>0.003</b><br><b>0.003<sup>+</sup></b>                                 |

|                                        |                     |                     |                     |                                                    |
|----------------------------------------|---------------------|---------------------|---------------------|----------------------------------------------------|
| WBC (G/L)                              | 8.0 (6.7-9.5)       | 8.3 (6.4-10.6)      | 8.6 (6.9-10.6)      | 0.378                                              |
| MCV (fL)                               | 90.9 (89.9-94.3)    | 89.1 (86.4-92.5)    | 89.3 (85.3-92.8)    | 0.362                                              |
| Platelet count (G/L)                   | 230.0 (184.0-253.0) | 215.0 (183.0-262.0) | 216.0 (198.5-262.5) | 0.934                                              |
| APTT                                   | 28.4±3.0            | 28.5±3.4            | 27.5±3.1            | 0.467                                              |
| INR                                    | 0.96 (0.93-1.01)    | 0.97 (0.94-1.02)    | 0.96 (0.92-0.99)    | 0.370                                              |
| Stroke etiology (TOAST), n (%)         |                     |                     |                     |                                                    |
| Large artery atherosclerosis           | 36 (33)             | 29 (29)             | 13 (65)             | 0.052                                              |
| Cardioembolic                          | 23 (21)             | 17 (17)             | 3 (15)              |                                                    |
| Small-vessel occlusion                 | 24 (21)             | 30 (30)             | 3 (15)              |                                                    |
| Other/undetermined                     | 28 (25)             | 24 (24)             | 1 (5)               |                                                    |
| Admission BP systolic (mmHg), mean±SD  | 160.6±26.2          | 172.1±26.0          | 182.8±25.0          | <b>&lt;0.001</b><br><b>0.004*</b><br><b>0.001*</b> |
| Admission BP diastolis (mmHg), mean±SD | 91.0±16.3           | 95.9±15.7           | 101.4±19.0          | <b>0.011</b><br><b>0.024*</b>                      |
| Imaging data, median (IQR)             |                     |                     |                     |                                                    |
| ASPECTS on admission                   | 10 (9-10)           | 10 (9-10)           | 10 (8-10)           | 0.67                                               |
| ASPECTS at 24 h                        | 8 (6-10)            | 8 (7-10)            | 7 (5-9)             | 0.503                                              |
| Alcohol consumption habits, n (%)      |                     |                     |                     |                                                    |
| Non-, mild drinker                     | 46 (41)             | 63 (60)             | 15 (71)             | <b>0.003</b>                                       |
| Moderate, heavy drinker                | 67(59)              | 42 (40)             | 6 (29)              |                                                    |

Abbreviations: IQR, interquartile range; VBI, vertebrobasilar insufficiency; MCA, middle cerebral artery; BMI, body mass index; NIHSS, National Institutes of Health Stroke Scale; OTN, onset-to-needle time; DTN, door-to-needle time; rt-PA, recombinant tissue plasminogen activator; hsCRP, high-sensitive C-reactive protein; AST, aspartate aminotransferase; ALT, alanine aminotransferase; GGT, gamma-glutamyl transferase; WBC, white blood cell count; MCV, mean cellular volume; APTT, activated partial thromboplastin time; INR, international normalized ratio; TOAST, Trial of ORG 10172 in Acute Stroke Treatment; BP, blood pressure; ASPECTS, The Alberta Stroke Program early CT score.

\*good outcome versus unchanged state (ANOVA, Bonferroni post-hoc-test or Kruskal-Wallis, Dunn's post-hoc-test).

#unchanged state versus poor outcome (Kruskal-Wallis, Dunn's post-hoc-test).

\*good outcome versus poor outcome (ANOVA, Bonferroni post-hoc-test).

**Supplementary Table S2. Association between baseline clinical data, laboratory parameters and long term outcomes in cases (alcohol group) and controls.**

|                                         | mRS 0-2             | mRS 3-6             | p                |
|-----------------------------------------|---------------------|---------------------|------------------|
| Number of patients, n (%)               | 168                 | 72                  |                  |
| Male, n (%)                             | 148 (88)            | 56 (77)             | <b>0.040</b>     |
| Age (years), median (IQR)               | 60 (52-69)          | 63 (59-69)          | <b>0.005</b>     |
| Etanol level (‰), median (IQR)          | 1.53 (0.52-2.19)    | 0.74 (0.48-1.55)    | 0.201            |
| Acute alcohol consumption, n (%)        | 52 (31)             | 6 (8)               | <b>0.001</b>     |
| Affected brain area, n (%)              |                     |                     |                  |
| VBI                                     | 53 (32)             | 11 (15)             | <b>0.011</b>     |
| Dominant MCA area                       | 33 (20)             | 24 (33)             |                  |
| Non-dominant MCA area                   | 83 (48)             | 37 (52)             |                  |
| Cerebrovascular risk factors, n (%)     |                     |                     |                  |
| Hypertension                            | 114 (68)            | 63 (88)             | <b>0.002</b>     |
| Diabetes mellitus                       | 26 (15)             | 21 (29)             | <b>0.014</b>     |
| Hyperlipidemia                          | 74 (44)             | 30 (42)             | 0.733            |
| Atrial fibrillation                     | 20 (12)             | 7 (10)              | 0.609            |
| Previous stroke                         | 20 (12)             | 11 (15)             | 0.475            |
| Previous myocardial infarction          | 15 (9)              | 10 (14)             | 0.153            |
| Previous peripheral artery disease      | 3 (1.8)             | 2 (2.8)             | 0.638            |
| Current smoker                          | 87 (52)             | 33 (46)             | 0.398            |
| BMI, median (IQR)                       | 27.1 (23.8-30.9)    | 28.4 (23.6-31.5)    | 0.410            |
| Admission antiplatelet therapy, n (%)   | 36 (21)             | 22 (31)             | 0.130            |
| Admission anticoagulant drug, n (%)     | 7 (4)               | 5 (7)               | 0.354            |
| Admission antidiabetic therapy, n (%)   | 20 (12)             | 13 (18)             | 0.131            |
| Admission lipid lowering therapy, n (%) | 23 (14)             | 13 (18)             | 0.386            |
| Admission NIHSS, median (IQR)           | 6.0 (5.0-10.0)      | 11.0 (8.0-14.0)     | <b>&lt;0.001</b> |
| OTN, min, median (IQR)                  | 137 (109-180)       | 137 (107-181)       | 0.722            |
| DTN min, median (IQR)                   | 42 (31-58)          | 44 (36-56)          | 0.258            |
| Rt-PA dose, mg, median (IQR)            | 70.5 (60.0-85.3)    | 74.0 (60.0-81.5)    | 0.805            |
| Laboratory parameters, median (IQR)     |                     |                     |                  |
| Serum sodium (mmol/L)                   | 139.0 (137.0-142.0) | 139.0 (137.0-142.0) | 0.313            |
| Serum glucose (mmol/L)                  | 6.0 (5.4-7.1)       | 6.5 (5.6-8.9)       | <b>0.003</b>     |
| Creatinine (μmol/L)                     | 73.0 (65.0-89.8)    | 73.0 (62.8-92.5)    | 0.968            |
| HsCRP (mg/L)                            | 2.4 (1.2-4.2)       | 3.4 (1.6-10.6)      | <b>0.003</b>     |
| AST (U/L)                               | 21.0 (16.0-27.0)    | 20.0 (15.0-24.0)    | 0.149            |
| ALT (U/L)                               | 19.0 (14.0-28.8)    | 18.0 (14.0-25.0)    | 0.139            |
| GGT (U/L)                               | 38.0 (35.0-73.0)    | 38.0 (24.3-64.8)    | 0.879            |
| WBC (G/L)                               | 8.0 (6.4-9.7)       | 8.8 (7.1-10.9)      | <b>0.008</b>     |
| MCV (fL)                                | 89.8 (85.9-93.3)    | 89.3 (86.9-92.8)    | 0.958            |
| Platelet count (G/L)                    | 224.0 (184.0-252.0) | 219.5 (182.5-264.3) | 0.970            |
| APTT                                    | 28.4±3.2            | 28.3±3.3            | 0.856            |
| INR                                     | 0.96 (0.93-1.01)    | 0.97 (0.93-1.02)    | 0.387            |
| Stroke etiology (TOAST), n (%)          |                     |                     |                  |
| Large artery atherosclerosis            | 44 (2)              | 34 (48)             | <b>0.015</b>     |
| Cardioembolic                           | 31 (20)             | 12 (17)             |                  |
| Small-vessel occlusion                  | 44 (27)             | 13 (19)             |                  |
| Other/undetermined                      | 42 (26)             | 11 (16)             |                  |
| Admission BP systolic (mmHg), mean±SD   | 163.0±25.6          | 177.0±27.7          | <b>0.0002</b>    |

|                                           |           |           |       |
|-------------------------------------------|-----------|-----------|-------|
| Admission BP diastolic (mmHg),<br>mean±SD | 92.6±15.5 | 96.3±18.2 | 0.115 |
| Imaging data, median (IQR)                |           |           |       |
| ASPECTS on admission                      | 10 (9-10) | 10 (9-10) | 0.743 |
| ASPECTS at 24 hours                       | 8 (6-10)  | 8 (6-10)  | 0.909 |
| Alcohol consumption habits, n (%)         |           |           |       |
| Non-, mild drinker                        | 85 (51)   | 39 (54)   | 0.612 |
| Moderate, heavy drinker                   | 83 (49)   | 33 (46)   |       |

Abbreviations: mRS, modified Rankin Scale; IQR, interquartile range; VBI, vertebrobasilar insufficiency; MCA, middle cerebral artery; BMI, body mass index; NIHSS, National Institutes of Health Stroke Scale; mRS: modified Rankin Scale; ONT, onset to needle time; DTN, door-to-needle time; rt-PA, recombinant tissue plasminogen activator; hsCRP, high-sensitive C-reactive protein; AST, aspartate aminotransferase; ALT, alanine aminotransferase; GGT, gamma-glutamyl transferase; WBC, white blood cell count; MCV, mean cellular volume; APTT, activated partial thromboplastin time; INR, international normalized ratio; TOAST, Trial of ORG 10172 in Acute Stroke Treatment; BP, blood pressure; SD, standard deviation; ASPECTS, The Alberta Stroke Program early CT score.
